# Supplementary material
Source: PubMed Central journal article supplement (PMC4949602)
Supplement: NIHMS799630-supplement-supp.pdf [file NIHMS799630-supplement-supp.pdf]

## Supplementary Materials for

### **Biological pacemaker created by minimally invasive somatic reprogramming in pigs with complete heart block**

Yu-Feng Hu, James Frederick Dawkins, Hee Cheol Cho, Eduardo Marbán,\*  
Eugenio Cingolani\*

\*Corresponding author. E-mail: eugenio.cingolani@esmc.edu (E.C.); eduardo.marban@esmc.edu (E.M.).

Published 16 July 2014, *Sci. Transl. Med.* **6**, 245ra94 (2014)  
DOI: 10.1126/scitranslmed.3008681

#### **The PDF file includes:**

- Fig. S1. HR trends, diurnal changes, and physical activity data from a *TBX18*-transduced animal without backup electronic pacing, superimposed on the corresponding pooled data for the routine protocol.
- Fig. S2. *TBX18*-transduced cardiomyocytes for quantification.
- Fig. S3. Cx43 expression in iSAN cells.
- Fig. S4. Schematic of the experimental protocol in the porcine model of complete heart block.
- Fig. S5. Injection site images.
- Table S1. Baseline characteristics of *GFP* and *TBX18* groups.
- Table S2. Comparison of HRV between *TBX18* and *GFP* animals.
- Table S3. Staining conditions for HCN4.
- Table S4. Primer sequences for the different genes studied in reprogrammed cells.

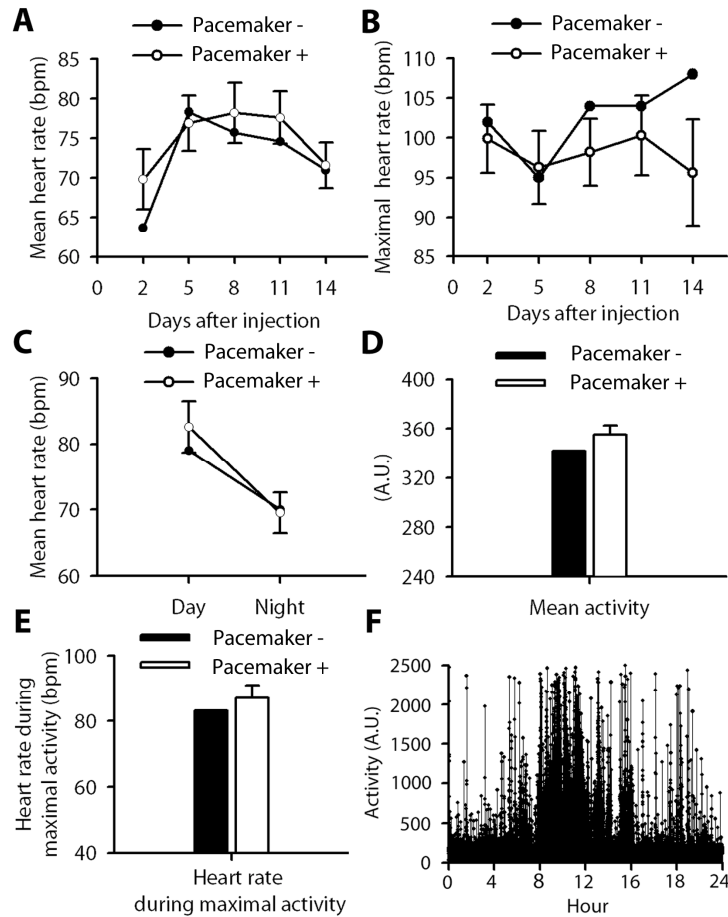

**Fig. S1. HR trends, diurnal changes, and physical activity data from a *TBX18*-transduced animal without backup electronic pacing, superimposed on the corresponding pooled data for the routine protocol.** *TBX18* vector was transduced in one animal without electronic pacemaker backup. The average heart rate (**A**), maximal heart rate (**B**), diurnal change (**C**), mean activity (**D**), and heart rate during maximal activity (**E**) during the 2-week period after gene transfer in the animal without a back-up electronic pacemaker are superimposed (**A** and **B**) or compared (**C** to **E**) to the corresponding pooled data from animals with back-up devices. The 24-hour activity pattern in the animal without a backup electronic pacemaker resembles that of animals with backup devices (**F**). These findings support the notion that the *TBX18* biological pacemaker can support both heart rate and physical activity without the need for a backup electronic pacemaker, at least in the single experiment performed and illustrated here.

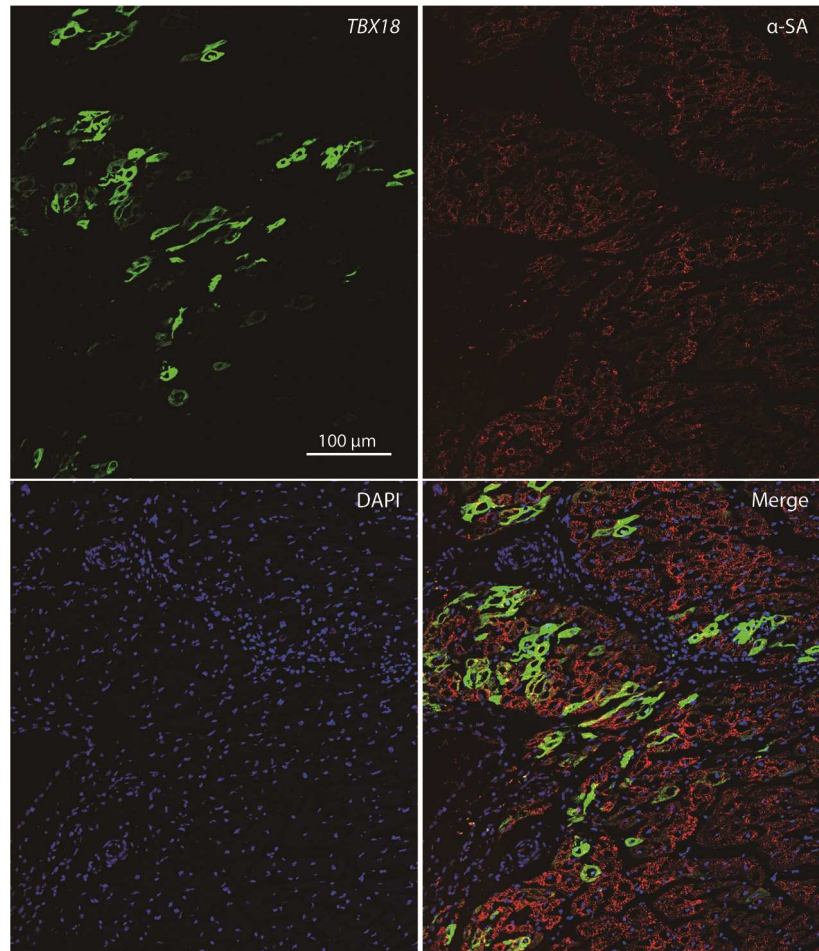

**Fig. S2. *TBX18*-transduced cardiomyocytes for quantification.** A typical field of *TBX18*-transduced heart proximal to the injection site, with staining for *TBX18* (indexed by coexpressed GFP),  $\alpha$ -sarcomeric actin, or DAPI, and a merged image as indicated. Twenty slides derived from two tissue blocks (0.5-cm thickness each), were used to count green cells. Block 1 yielded an average of 246 (range 100-768) green cells per slide, whereas block 2 revealed 342 (182-524) green cells per slide. Each block contained  $\sim$ 25 cell layers, yielding an estimated green cell number of 14,700 per heart. This lower-limit estimate does not count cells remote from the injection site, nor does it account for the loss of GFP expression that may be seen in durably reprogrammed iSAN cells.

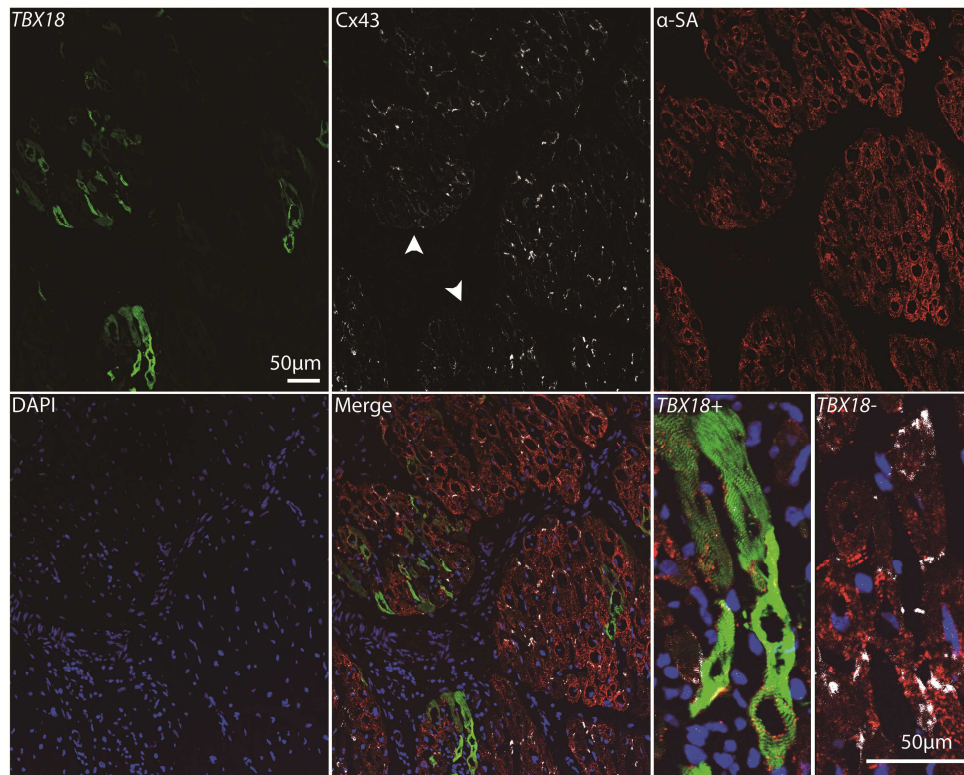

**Fig. S3. Cx43 expression in iSAN cells.** Myocardial regions (arrowheads) enriched in *TBX18*-transduced cardiomyocytes (GFP+) exhibited a lower density of Cx43 compared with those without *TBX18* transduction. The right lower panel compares enlarged images of cardiomyocytes with or without *TBX18* transduction, showing differences in Cx43 expression (white).

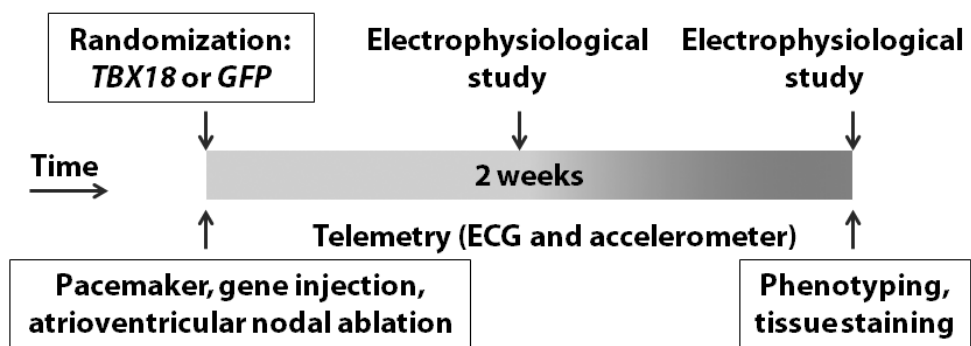

**Fig. S4.** Schematic of the experimental protocol in the porcine model of complete heart block.

### Injection site (fluoroscopy)

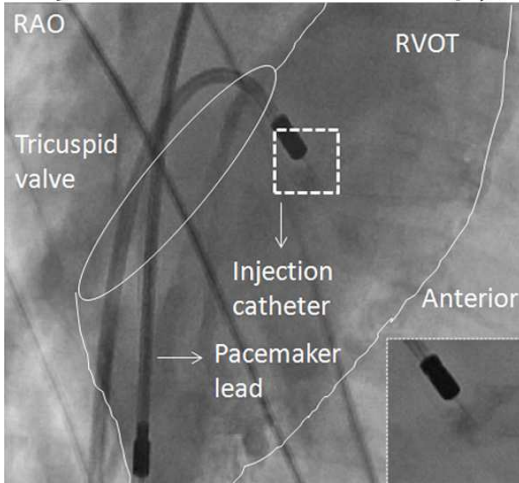

### Injection site (anatomic)

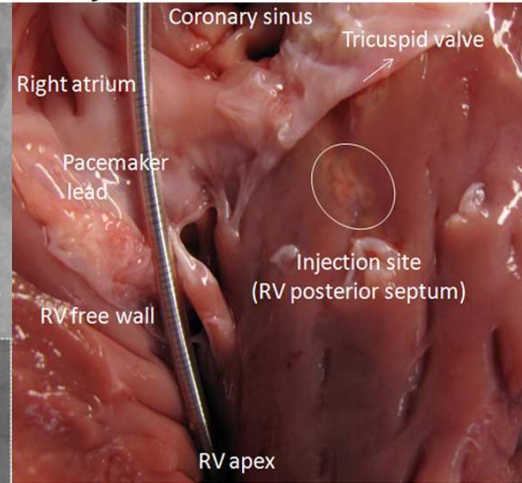

**Fig. S5. Injection site images.** RAO, right anterior oblique view; RV, right ventricle; RVOT, outflow tract of right ventricle.

## SUPPLEMENTARY TABLES

**Table S1. Baseline characteristics of *GFP* and *TBX18* groups.** Data are expressed as means  $\pm$  SEM ( $n = 5$  *GFP*, 7 *TBX18*). Averaged APD<sub>90</sub>: the average of action potential duration at 90% from four locations (anterior, septal, lateral and apical wall); Corrected QT interval: QT interval corrected by Bazett's formula; ALT, alanine aminotransferase; AST, aspartate aminotransferase; BUN, blood urea nitrogen; CPK: creatine phosphokinase; CKMB, MB isoenzyme of CPK; HGB, hemoglobin; WBC, white blood cell count. *P*-values determined by two-sample *t* test.

|                                   | <i>GFP</i>         | <i>TBX18</i>       | <i>P</i> -value |
|-----------------------------------|--------------------|--------------------|-----------------|
| Age (months)                      | 3.1 $\pm$ 0.2      | 3.4 $\pm$ 0.3      | 0.10            |
| Body weight (kg)                  | 33.0 $\pm$ 2.1     | 36.5 $\pm$ 6.9     | 0.30            |
| <b>ECG parameters</b>             |                    |                    |                 |
| Heart rate (ms)                   | 562.2 $\pm$ 74.4   | 586.3 $\pm$ 137.7  | 0.73            |
| P wave duration (ms)              | 52.1 $\pm$ 3.5     | 56.3 $\pm$ 7.4     | 0.27            |
| PR interval (ms)                  | 102.6 $\pm$ 7.8    | 106.3 $\pm$ 12.1   | 0.57            |
| QRS duration (ms)                 | 42.6 $\pm$ 1.8     | 44.9 $\pm$ 3.4     | 0.21            |
| QT interval (ms)                  | 309.0 $\pm$ 28.3   | 326.0 $\pm$ 30.4   | 0.35            |
| Corrected QT interval (ms)        | 413.3 $\pm$ 13.3   | 428.8 $\pm$ 8.5    | 0.32            |
| Corrected QT dispersion           | 42.1 $\pm$ 6.3     | 43.2 $\pm$ 3.4     | 0.87            |
| Average APD <sub>90</sub> (ms)    | 207.2 $\pm$ 6.9    | 221.2 $\pm$ 10.2   | 0.32            |
| APD <sub>90</sub> dispersion (ms) | 33.1 $\pm$ 4.8     | 44.1 $\pm$ 4.0     | 0.11            |
| <b>Biochemistry</b>               |                    |                    |                 |
| <b><i>Liver function</i></b>      |                    |                    |                 |
| AST (IU/l)                        | 25.2 $\pm$ 4.9     | 20.6 $\pm$ 1.7     | 0.33            |
| ALT (IU/l)                        | 22.0 $\pm$ 2.6     | 23.5 $\pm$ 3.4     | 0.66            |
| Total bilirubin (mg/dl)           | 0.1 $\pm$ 0.0      | 0.1 $\pm$ 0.0      | 0.99            |
| Alk Phosphatase (IU/l)            | 141.2 $\pm$ 16.0   | 144.3 $\pm$ 7.5    | 0.85            |
| <b><i>Renal function</i></b>      |                    |                    |                 |
| BUN (mg/dl)                       | 10.0 $\pm$ 2.1     | 11.0 $\pm$ 0.6     | 0.61            |
| Creatinine (mg/dl)                | 1.58 $\pm$ 0.07    | 1.49 $\pm$ 0.11    | 0.52            |
| <b><i>Pancreas function</i></b>   |                    |                    |                 |
| Amylase (IU/l)                    | 1491.4 $\pm$ 127.9 | 1235.7 $\pm$ 122.0 | 0.19            |
| <b><i>Cardiac enzyme</i></b>      |                    |                    |                 |
| CPK (ng/ml)                       | 473.8 $\pm$ 52.6   | 420.7 $\pm$ 45.2   | 0.46            |
| CKMB (%)                          | 1.52 $\pm$ 0.75    | 1.30 $\pm$ 0.32    | 0.77            |
| Troponin I (ng/ml)                | 0.002 $\pm$ 0.002  | 0.005 $\pm$ 0.002  | 0.24            |

---

***Hematology***

|                                    |                  |                  |      |
|------------------------------------|------------------|------------------|------|
| WBC ( $10^3/\mu\text{l}$ )         | 16.0 $\pm$ 1.5   | 17.1 $\pm$ 2.1   | 0.69 |
| HGB (g/dl)                         | 8.9 $\pm$ 0.3    | 8.3 $\pm$ 0.2    | 0.08 |
| Platelets ( $10^3/\mu\text{l}$ )   | 337.8 $\pm$ 49.8 | 402.6 $\pm$ 39.8 | 0.33 |
| Lymphocytes ( $10^3/\mu\text{l}$ ) | 8.6 $\pm$ 0.9    | 9.5 $\pm$ 0.8    | 0.46 |
| Neutrophils ( $10^3/\mu\text{l}$ ) | 6.6 $\pm$ 1.1    | 7.0 $\pm$ 1.4    | 0.81 |
| Eosinophils ( $10^3/\mu\text{l}$ ) | 0.6 $\pm$ 0.2    | 0.3 $\pm$ 0.1    | 0.18 |

---



**Table S2. Comparison of HRV between *TBX18* and *GFP* animals.** Data are means  $\pm$  SEM ( $n = 5$  *GFP*, 7 *TBX18*). HF, high frequency; LF, low frequency; VLF, very low frequency; norm, normalized; n.u., normalized units. *P*-values determined by two-sample *t* test.

|                                | <i>GFP</i>      | <i>TBX18</i>    | <i>P</i> -value |
|--------------------------------|-----------------|-----------------|-----------------|
| VLF (ms <sup>2</sup> )         | 0.02 $\pm$ 0.01 | 0.05 $\pm$ 0.03 | 0.40            |
| LF (ms <sup>2</sup> )          | 0.04 $\pm$ 0.01 | 0.04 $\pm$ 0.01 | 0.48            |
| HF (ms <sup>2</sup> )          | 0.05 $\pm$ 0.01 | 0.04 $\pm$ 0.01 | 0.71            |
| Total power (ms <sup>2</sup> ) | 0.11 $\pm$ 0.01 | 0.10 $\pm$ 0.02 | 0.68            |
| LF norm (n.u.)                 | 46.8 $\pm$ 6.9  | 49.5 $\pm$ 8.0  | 0.81            |
| HF norm (n.u.)                 | 53.2 $\pm$ 6.9  | 45.9 $\pm$ 3.7  | 0.34            |
| LF/HF                          | 0.98 $\pm$ 0.21 | 1.91 $\pm$ 0.29 | 0.04            |

**Table S3. Staining conditions for HCN4.** Four different antibodies were tested.

|                               | <b>Alomone,<br/>APC052</b>                  | <b>Abcam,<br/>ab32675</b>                   | <b>Novus<br/>biological,<br/>S114-10</b>    | <b>Millipore<br/>AB5808</b> |
|-------------------------------|---------------------------------------------|---------------------------------------------|---------------------------------------------|-----------------------------|
| <b>Antibody concentration</b> |                                             |                                             |                                             |                             |
| Primary antibody              | 1:10,<br>1:20,<br>1:50,<br>1:100,<br>1: 400 | 1:10,<br>1:20,<br>1:50,<br>1:100,<br>1: 400 | 1:10,<br>1:20,<br>1:50,<br>1:100,<br>1: 400 | 1:10,<br>1:50               |
| Secondary antibody            | 1:400,<br>1:200                             | 1:400<br>1:200                              | 1:400<br>1:200                              | 1:400                       |
| <b>Permeabilization</b>       |                                             |                                             |                                             |                             |
| Triton                        | +                                           | +                                           | +                                           | +                           |
| Saponin                       | +                                           | +                                           | +                                           | +                           |
| <b>Tissue preparation</b>     |                                             |                                             |                                             |                             |
| Fresh frozen without fixation | +                                           | +                                           | +                                           |                             |
| Formalin fixation             | +                                           | +                                           | +                                           | +                           |
| <b>Antigen retrieval</b>      |                                             |                                             |                                             |                             |
|                               | With and<br>without                         | With and<br>without                         | With and<br>without                         | With and<br>without         |
| <b>Overnight incubation</b>   |                                             |                                             |                                             |                             |
|                               | +                                           | +                                           | +                                           | +                           |

**Table 4. Primer sequences for the different genes studied in reprogrammed cells.**

|                | <b>Forward primer</b> | <b>Reverse primer</b> | <b>Probe</b>         |
|----------------|-----------------------|-----------------------|----------------------|
| <b>HCN4</b>    | CAAGCAGGTGGAGCAGTACA  | TGCGGCAGTTAAAGTTGATG  | CAGCGCATCCACGACTACTA |
| <b>Cx43</b>    | GGATCGTGTGAAGGGAAAGA  | GCTCGGCACTGTAATTAGCC  | AGCTGGTTACCGGAGACAGA |
| <b>Cx45</b>    | CACCGAGCTCTGGAAGAAAC  | ACCTCAAACATGGTCCTTGC  | GGACCCCATGATGTATCCAG |
| <b>Kir2.1</b>  | AGTGCCAGGGACTTAGCAGA  | TAGAGGTACGCTTGCCTGGT  | GTGAAAACGGAGTCCCAGAA |
| <b>Actinin</b> | CATGCTGCTTTTGGAAAGTCA | GGCAGAGGTTTCTTCGACTG  | ATTGTTGATGGCAACGTGAA |
| <b>Nkx2.5</b>  | TCGAGCCGATAAGAAAGAGC  | AGATCTTGACCTGCGTGGAC  | ACAGGTCTACGAGCTGGAGC |
| <b>Nav1.5</b>  | GCTACACCAGCTTCGACTCC  | TTCTCCTCCGTCTCAGCAAT  | ATGCTTGTCATCTTCCTGGG |
| <b>Actin</b>   | TGTGCTGGACTCTGGAGATG  | GTGGTCACGAAGGAGTAGCC  | GCCGAGATCTCACCGACTAC |
